# Supplementary material for: Appearance of β-lactam Resistance Genes in Agricultural Soils and Clinical Isolates over the 20th Century
Source: PubMed Central journal article supplement (PMC4754643; doi:10.1038/srep21550), 2016-02-16
Supplement: srep21550-s1.pdf [file srep21550-s1.pdf]

# Supporting Information

## Appearance of $\beta$ -lactam Resistance Genes in Agricultural Soils and Clinical Isolates over the 20<sup>th</sup> Century

David W. Graham<sup>1\*</sup>, Charles W. Knapp<sup>2\*</sup>, Bent T. Christensen<sup>3</sup>,

Seánín McCluskey<sup>2</sup>, Jan Dolfing<sup>1</sup>

<sup>1</sup> – School of Civil Engineering & Geosciences, Newcastle University, Newcastle upon Tyne,

United Kingdom, NE1 7RU

<sup>2</sup> - Department of Civil and Environmental Engineering, University of Strathclyde, Glasgow,

United Kingdom, G1 1XJ

<sup>3</sup> – Department of Agroecology, Aarhus University, AU-Foulum, DK-8830 Tjele, Denmark

Content: Five tables and one figure.

Corresponding authors: Prof David W. Graham  
School of Civil Engineering & Geosciences  
Newcastle University  
Newcastle upon Tyne, United Kingdom NE1 7RU  
E-mail: [d.graham@ncl.ac.uk](mailto:d.graham@ncl.ac.uk), Phone: +44 (0) 191 208 7930

Dr Charles Knapp  
Department of Civil and Environmental Engineering  
University of Strathclyde  
Glasgow, United Kingdom G1 1XJ  
E-mail: [charles.knapp@strath.ac.uk](mailto:charles.knapp@strath.ac.uk), Phone: +44 (0)141 548 3351

**Table S1.** qPCR quantification of mean 16S-rRNA, broad spectrum  $\beta$ -lactam resistance, and integron integrase genes (log abundances/g dry-weight soil) detected in archived soils from fields only provided inorganic fertilisers (IF) since 1894. Means of duplicates are reported. Measured duplicate samples were always  $< 0.5$  log of each other.

| <b>Year</b>   | <b>16S-rRNA</b> | <b><i>bla</i><sub>TEM</sub></b> | <b><i>bla</i><sub>SHV</sub></b> | <b><i>bla</i><sub>OXA</sub></b> | <b><i>bla</i><sub>CTX-M</sub></b> | <b><i>int1</i></b> |
|---------------|-----------------|---------------------------------|---------------------------------|---------------------------------|-----------------------------------|--------------------|
| 1923          | 9.44            | 5.00                            | 3.99                            | 4.68                            | 4.77                              | 3.78               |
| 1938          | 9.50            | 5.07                            | 4.42                            | 3.69                            | 4.71                              | 4.29               |
| 1945          | 9.49            | 4.91                            | 4.10                            | 3.98                            | 3.37                              | 3.80               |
| 1953          | 9.58            | 4.99                            | 3.96                            | 4.13                            | 4.14                              | 3.84               |
| 1964          | 9.74            | 4.66                            | 3.41                            | 3.97                            | 3.43                              | 4.11               |
| 1976          | 9.80            | 4.74                            | 3.31                            | 4.10                            | 5.05                              | 3.90               |
| 1985          | 9.40            | 4.34                            | 4.16                            | 3.67                            | 4.66                              | 3.74               |
| 1988          | 9.80            | 4.21                            | 3.67                            | 3.61                            | 4.48                              | 3.91               |
| 1992          | 9.89            | 5.21                            | 3.59                            | 3.69                            | 5.67                              | 3.80               |
| 1996          | 9.72            | 4.86                            | 3.44                            | 4.19                            | 5.05                              | 4.34               |
| 2000          | 10.0            | 5.00                            | 3.10                            | 4.36                            | 5.27                              | 4.60               |
| 2010          | 9.81            | 5.07                            | 4.47                            | 4.51                            | 4.66                              | 4.56               |
| <b>Mean</b>   | <b>9.68</b>     | <b>4.84</b>                     | <b>3.80</b>                     | <b>4.05</b>                     | <b>4.60</b>                       | <b>4.05</b>        |
| <b>SD</b>     | <b>0.20</b>     | <b>0.30</b>                     | <b>0.45</b>                     | <b>0.35</b>                     | <b>0.68</b>                       | <b>0.32</b>        |
| <b>95% CI</b> | <b>0.11</b>     | <b>0.16</b>                     | <b>0.24</b>                     | <b>0.19</b>                     | <b>0.37</b>                       | <b>0.17</b>        |

**Table S2.** qPCR quantification of mean 16S-rRNA, broad spectrum  $\beta$ -lactam resistance, and integron intergase genes (log abundances/g dry weight soil) detected in archived soils from fields provided only manure (M) since 1894. Means of duplicates are reported. Measured duplicate samples were always  $< 0.5$  log of each other.

| <b>Year</b>   | <b>16S-rRNA</b> | <b><i>bla</i><sub>TEM</sub></b> | <b><i>bla</i><sub>SHV</sub></b> | <b><i>bla</i><sub>OXA</sub></b> | <b><i>bla</i><sub>CTX-M</sub></b> | <b><i>int1</i></b> |
|---------------|-----------------|---------------------------------|---------------------------------|---------------------------------|-----------------------------------|--------------------|
| 1923          | 9.44            | 5.24                            | 4.20                            | 4.55                            | 4.57                              | 3.80               |
| 1938          | 9.62            | 5.04                            | 4.46                            | 4.4                             | 4.38                              | 4.01               |
| 1945          | 9.54            | 4.91                            | 4.23                            | 4.26                            | 4.25                              | 4.03               |
| 1953          | 9.63            | 4.88                            | 4.11                            | 4.34                            | 4.67                              | 4.05               |
| 1964          | 9.62            | 5.05                            | 3.98                            | 3.90                            | 4.52                              | 4.21               |
| 1976          | 9.14            | 5.10                            | 4.63                            | 4.83                            | 4.32                              | 4.25               |
| 1985          | 9.21            | 5.06                            | 4.34                            | 4.53                            | 4.28                              | 4.21               |
| 1988          | 10.4            | 5.55                            | 4.24                            | 5.20                            | 6.65                              | N/A <sup>a</sup>   |
| 1992          | 9.92            | 5.21                            | 4.13                            | 4.20                            | 5.91                              | 4.84               |
| 1996          | 9.40            | 4.94                            | 3.74                            | 4.00                            | 5.25                              | 4.73               |
| 2000          | 9.56            | 5.14                            | 4.22                            | 4.27                            | 5.17                              | 5.00               |
| 2010          | 9.76            | 5.10                            | 3.97                            | 4.90                            | 4.60                              | 5.26               |
| <b>Mean</b>   | <b>9.60</b>     | <b>5.10</b>                     | <b>4.19</b>                     | <b>4.45</b>                     | <b>4.88</b>                       | <b>4.41</b>        |
| <b>SD</b>     | <b>0.32</b>     | <b>0.18</b>                     | <b>0.23</b>                     | <b>0.38</b>                     | <b>0.74</b>                       | <b>0.46</b>        |
| <b>95% CI</b> | <b>0.18</b>     | <b>0.10</b>                     | <b>0.13</b>                     | <b>0.21</b>                     | <b>0.40</b>                       | <b>0.25</b>        |

Notes: <sup>a</sup> N/A = Not available.

**Table S3.** Metal and nutrient concentrations in archived soils from fields provided inorganic fertilisers (IF) since 1894. Nutrient levels were determined at the time of historic sampling, whereas heavy metals were analysed on archived soils during this study.

| <b>Year</b>   | <b>As<br/>(ppm)<sup>a</sup></b> | <b>Cd<br/>(ppm)</b> | <b>Co<br/>(ppm)</b> | <b>Cr<br/>(ppm)</b> | <b>Cu<br/>(ppm)</b> | <b>Hg<br/>(ppb)</b> | <b>Ni<br/>(ppm)</b> | <b>Pb<br/>(ppm)</b> | <b>Zn<br/>(ppm)</b> | <b>TC<br/>(g C/100 g)</b> | <b>TN<br/>(g N/100 g)</b> | <b>Ext P<br/>(mg P/100 g)</b> | <b>Ext K<br/>(mg K/100 g)</b> |
|---------------|---------------------------------|---------------------|---------------------|---------------------|---------------------|---------------------|---------------------|---------------------|---------------------|---------------------------|---------------------------|-------------------------------|-------------------------------|
| 1923          | 3.3                             | 0.15                | 2.6                 | 6.2                 | 5.76                | 43                  | 3.6                 | 12.1                | 17.3                | 0.118                     | 1.44                      | 6.3                           | 2.4                           |
| 1938          | 4.0                             | 0.16                | 2.4                 | 5.9                 | 4.20                | 63                  | 3.2                 | 12.3                | 15.8                | 0.111                     | 1.49                      | 3.9                           | 4.3                           |
| 1945          | 3.9                             | 0.17                | 2.3                 | 6.2                 | 4.09                | 66                  | 3.2                 | 12.8                | 16.9                | 0.117                     | 1.36                      | 7.8                           | 5.2                           |
| 1953          | 3.9                             | 0.19                | 2.6                 | 5.8                 | 3.67                | 60                  | 2.9                 | 12.5                | 15.7                | 0.115                     | 1.36                      | 12.3                          | 3.6                           |
| 1964          | 4.3                             | 0.19                | 2.5                 | 6.4                 | 4.04                | 107                 | 3.4                 | 12.2                | 21.6                | 0.125                     | 1.38                      | 13.2                          | 5.3                           |
| 1976          | 4.0                             | 0.20                | 2.9                 | 6.7                 | 4.18                | 74                  | 3.6                 | 13.1                | 21.0                | 0.108                     | 1.46                      | 15.6                          | 8.3                           |
| 1985          | 4.1                             | 0.20                | 3.2                 | 12.7                | 3.85                | 61                  | 6.1                 | 12.7                | 20.0                | 0.106                     | 1.25                      | 17.4                          | 5.9                           |
| 1996          | 3.9                             | 0.23                | 2.5                 | 9.5                 | 4.31                | 73                  | 4.9                 | 14.2                | 23.7                | 0.12                      | 1.31                      | 16.2                          | 6.9                           |
| 2000          | 3.6                             | 0.20                | 2.9                 | 14.8                | 4.03                | 49                  | 7.4                 | 12.3                | 20.0                | 0.102                     | 1.24                      | N/A <sup>b</sup>              | 5.4                           |
| 2010          | 4.2                             | 0.19                | 3.1                 | 8.0                 | 4.63                | 56                  | 3.7                 | 13.6                | 24.2                | 0.106                     | 1.19                      | 20.4                          | 7.1                           |
| <b>Mean</b>   | <b>3.92</b>                     | <b>0.188</b>        | <b>2.70</b>         | <b>8.22</b>         | <b>4.28</b>         | <b>65.2</b>         | <b>4.20</b>         | <b>12.8</b>         | <b>19.6</b>         | <b>0.113</b>              | <b>1.35</b>               | <b>12.6</b>                   | <b>5.44</b>                   |
| <b>SD</b>     | <b>0.290</b>                    | <b>0.023</b>        | <b>0.31</b>         | <b>3.16</b>         | <b>0.58</b>         | <b>17.6</b>         | <b>1.48</b>         | <b>0.7</b>          | <b>3.10</b>         | <b>0.007</b>              | <b>0.10</b>               | <b>5.53</b>                   | <b>1.74</b>                   |
| <b>95% CI</b> | <b>0.180</b>                    | <b>0.014</b>        | <b>0.19</b>         | <b>1.96</b>         | <b>0.36</b>         | <b>10.9</b>         | <b>0.92</b>         | <b>0.4</b>          | <b>1.92</b>         | <b>0.005</b>              | <b>0.06</b>               | <b>3.43</b>                   | <b>1.08</b>                   |

Notes: <sup>a</sup> Mass per mass of dry soil

<sup>b</sup> N/A = Not available.

**Table S4.** Metal and nutrient concentrations in archived soils from manure (M) fields since 1894. Nutrient levels were determined at the time of historic sampling, whereas heavy metals were analysed on archived soils during this study.

| <b>Year</b>   | <b>As<br/>(ppm)<sup>a</sup></b> | <b>Cd<br/>(ppm)</b> | <b>Co<br/>(ppm)</b> | <b>Cr<br/>(ppm)</b> | <b>Cu<br/>(ppm)</b> | <b>Hg<br/>(ppb)</b> | <b>Ni<br/>(ppm)</b> | <b>Pb<br/>(ppm)</b> | <b>Zn<br/>(ppm)</b> | <b>TC<br/>(g C/100 g)</b> | <b>TN<br/>(g N/100 g)</b> | <b>Ext P<br/>(mg P/100 g)</b> | <b>Ext K<br/>(mg K/100 g)</b> |
|---------------|---------------------------------|---------------------|---------------------|---------------------|---------------------|---------------------|---------------------|---------------------|---------------------|---------------------------|---------------------------|-------------------------------|-------------------------------|
| 1923          | 1.7                             | 0.11                | 2.1                 | 5.0                 | 4.38                | 27                  | 2.7                 | 9.9                 | 13.5                | 0.133                     | 1.53                      | 4.2                           | 1.4                           |
| 1938          | 2.4                             | 0.14                | 2.5                 | 5.6                 | 4.54                | 78                  | 3.1                 | 12.0                | 15.9                | 0.126                     | 1.68                      | 2.7                           | 3                             |
| 1945          | 2.9                             | 0.14                | 2.4                 | 5.6                 | 4.18                | 59                  | 3.1                 | 12.0                | 17.6                | 0.131                     | 1.5                       | 6                             | 5.7                           |
| 1953          | 2.7                             | 0.16                | 2.4                 | 5.9                 | 4.41                | 80                  | 3.2                 | 12.7                | 18.4                | 0.133                     | 1.54                      | 10.8                          | 4.4                           |
| 1964          | 2.9                             | 0.16                | 2.5                 | 6.2                 | 4.21                | 130                 | 3.2                 | 13.3                | 23.6                | 0.128                     | 1.6                       | 13.8                          | 4.2                           |
| 1976          | 3.1                             | 0.18                | 2.7                 | 7.6                 | 4.30                | 54                  | 4.2                 | 12.6                | 21.3                | 0.115                     | 1.6                       | 14.4                          | 6.5                           |
| 1985          | 3.4                             | 0.19                | 4.2                 | 22.5                | 4.63                | 65                  | 10.6                | 14.4                | 23.4                | 0.122                     | 1.37                      | 18.3                          | 7.5                           |
| 1996          | 3.1                             | 0.21                | 3.1                 | 15.9                | 6.08                | 57                  | 8.3                 | 14.0                | 25.1                | 0.135                     | 1.42                      | 16.2                          | 8.1                           |
| 2000          | 3.0                             | 0.18                | 2.6                 | 11.8                | 6.23                | 46                  | 5.8                 | 12.8                | 22.1                | 0.122                     | 1.38                      | N/A <sup>b</sup>              | 5.5                           |
| 2010          | 3.4                             | 0.18                | 3.5                 | 7.8                 | 9.16                | 53                  | 4.4                 | 13.5                | 28.3                | 0.127                     | 1.31                      | 19.2                          | 7.8                           |
| <b>Mean</b>   | <b>2.86</b>                     | <b>0.165</b>        | <b>2.80</b>         | <b>9.39</b>         | <b>5.21</b>         | <b>64.9</b>         | <b>4.86</b>         | <b>12.7</b>         | <b>20.9</b>         | <b>0.127</b>              | <b>1.49</b>               | <b>11.7</b>                   | <b>5.41</b>                   |
| <b>SD</b>     | <b>0.51</b>                     | <b>0.029</b>        | <b>0.63</b>         | <b>5.74</b>         | <b>1.58</b>         | <b>27.5</b>         | <b>2.64</b>         | <b>1.27</b>         | <b>4.53</b>         | <b>0.006</b>              | <b>0.12</b>               | <b>6.15</b>                   | <b>2.19</b>                   |
| <b>95% CI</b> | <b>0.31</b>                     | <b>0.018</b>        | <b>0.39</b>         | <b>3.56</b>         | <b>0.98</b>         | <b>17.0</b>         | <b>1.64</b>         | <b>0.79</b>         | <b>2.81</b>         | <b>0.004</b>              | <b>0.07</b>               | <b>3.81</b>                   | <b>1.35</b>                   |

Notes: <sup>a</sup> Mass per mass of dry soil

<sup>b</sup> N/A = Not available.

**Figure S1.** Relative mass of selected heavy metal and nutrients in archived soils compared with soils from before 1940 from manure (M) and inorganic fertiliser (IF) fields. Specific metals or nutrients are noted on y-axes and reported as ratios (i.e., mass of metal per date/mean mass of metal in samples from 1923 and 1938 samples).

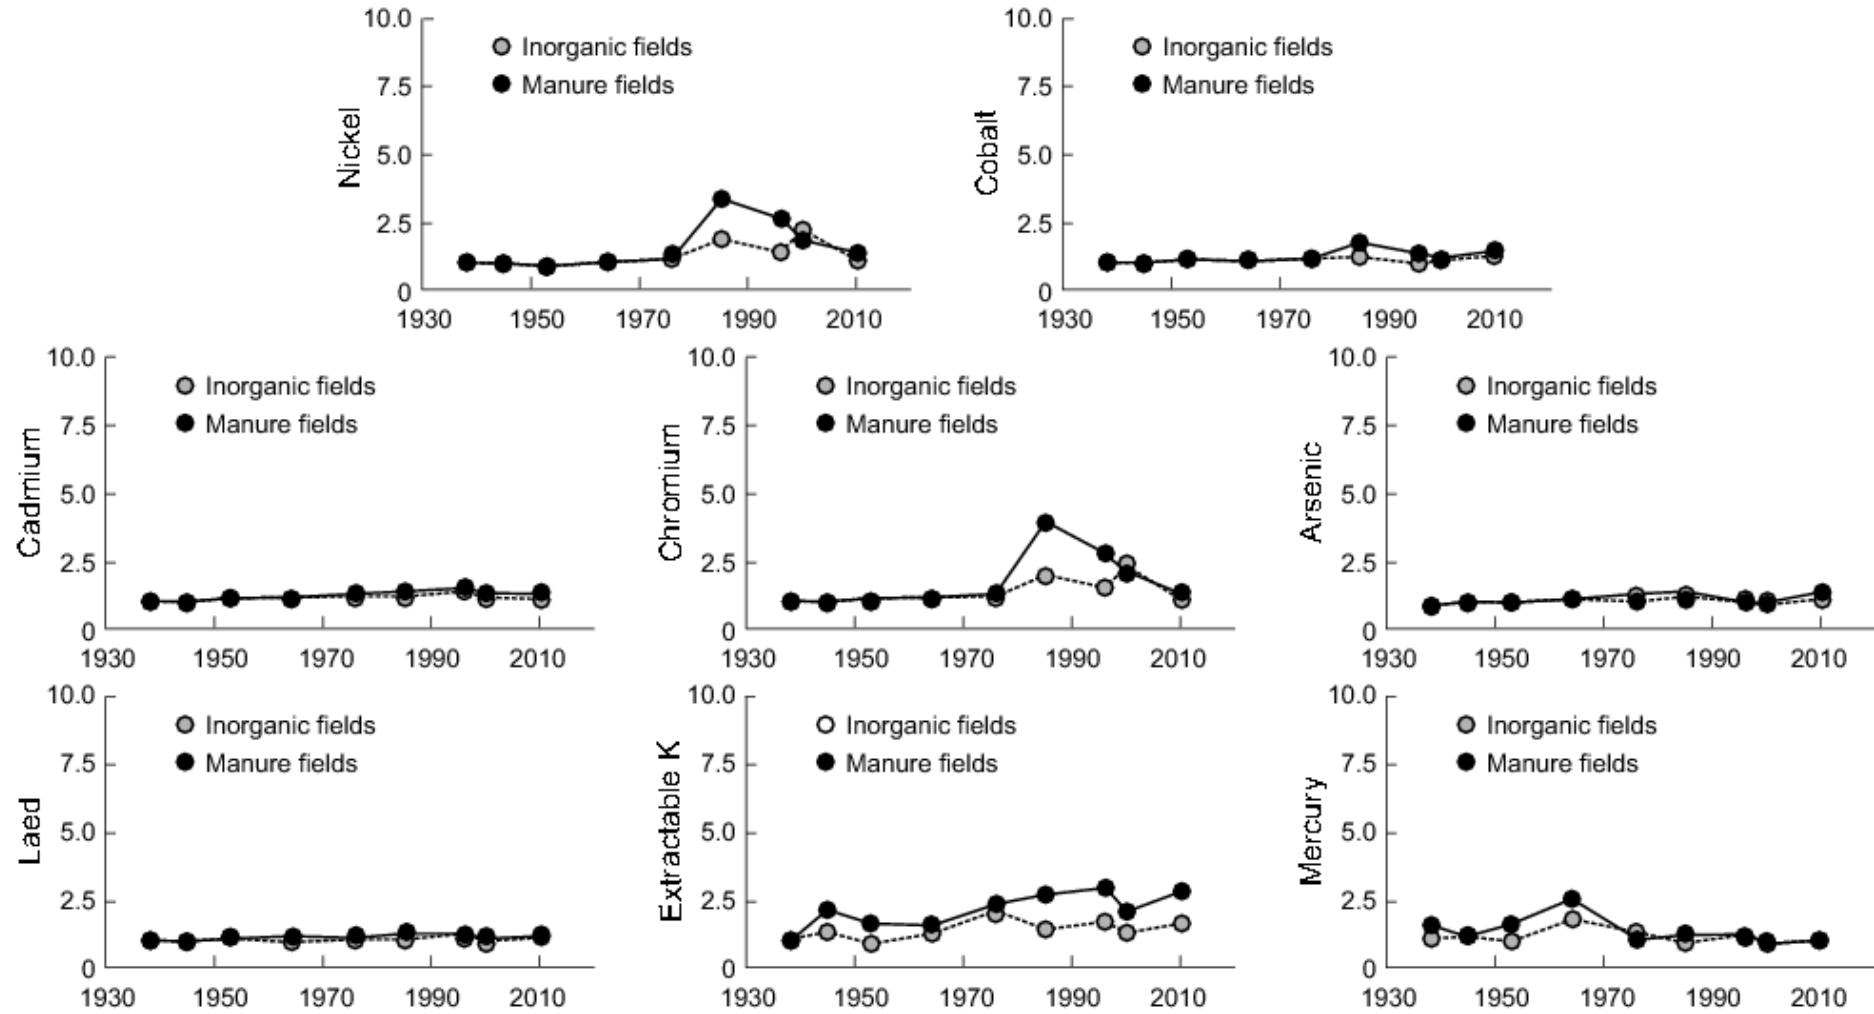

**Table S5.** Spearman's rank correlation coefficients between time, metals, nutrients and genes versus time or specific ARGs or *int1* genes in archived soils from manure (M) and inorganic (IF) fertilised fields after 1940. Significant correlations are in bold and p-values in brackets.

|      | Inorganic                           |                           |                           |                                     |                                     |                   | Manure                              |                           |                                      |                           |                                     |                                     |
|------|-------------------------------------|---------------------------|---------------------------|-------------------------------------|-------------------------------------|-------------------|-------------------------------------|---------------------------|--------------------------------------|---------------------------|-------------------------------------|-------------------------------------|
|      | Time <sup>a</sup>                   | <i>bla</i> <sub>TEM</sub> | <i>bla</i> <sub>SHV</sub> | <i>bla</i> <sub>OXA</sub>           | <i>bla</i> <sub>CTX-M</sub>         | <i>int1</i>       | Time                                | <i>bla</i> <sub>TEM</sub> | <i>bla</i> <sub>SHV</sub>            | <i>bla</i> <sub>OXA</sub> | <i>bla</i> <sub>CTX-M</sub>         | <i>int1</i>                         |
| Time | -                                   | -0.146<br>(0.688)         | -0.127<br>(0.726)         | 0.018<br>(0.960)                    | <b>0.673<sup>b</sup></b><br>(0.033) | 0.467<br>(0.174)  | -                                   | 0.055<br>(0.881)          | -0.491<br>(0.150)                    | -0.012<br>(0.973)         | 0.418<br>(0.229)                    | <b>0.733<sup>b</sup></b><br>(0.016) |
| Mo   | 0.665 <sup>b</sup><br>(0.036)       | -0.07<br>(0.847)          | 0.238<br>(0.508)          | 0.043<br>(0.907)                    | 0.616<br>(0.058)                    | 0.427<br>(0.219)  | <b>0.875<sup>c</sup></b><br>(0.001) | -0.219<br>(0.544)         | -0.669 <sup>b</sup><br>(0.035)       | -0.291<br>(0.415)         | 0.474<br>(0.166)                    | 0.505<br>(0.137)                    |
| Cu   | -0.103<br>(0.777)                   | 0.438<br>(0.206)          | 0.624<br>(0.054)          | <b>0.661<sup>b</sup></b><br>(0.038) | -0.455<br>(0.187)                   | 0.515<br>(0.128)  | <b>0.709<sup>b</sup></b><br>(0.022) | -0.055<br>(0.881)         | -0.273<br>(0.446)                    | -0.073<br>(0.841)         | 0.103<br>(0.777)                    | <b>0.673<sup>b</sup></b><br>(0.033) |
| Pb   | 0.539<br>(0.108)                    | -0.292<br>(0.413)         | -0.115<br>(0.751)         | -0.055<br>(0.881)                   | 0.164<br>(0.651)                    | 0.285<br>(0.425)  | <b>0.806<sup>c</sup></b><br>(0.005) | 0.176<br>(0.627)          | -0.321<br>(0.365)                    | -0.110<br>(0.763)         | 0.491<br>(0.150)                    | <b>0.648<sup>b</sup></b><br>(0.043) |
| Zn   | <b>0.736<sup>b</sup></b><br>(0.015) | -0.055<br>(0.880)         | 0.474<br>(0.166)          | 0.109<br>(0.763)                    | 0.419<br>(0.228)                    | 0.584<br>(0.077)  | <b>0.879<sup>c</sup></b><br>(0.001) | 0.164<br>(0.651)          | -0.382<br>(0.276)                    | 0.104<br>(0.776)          | 0.321<br>(0.365)                    | <b>0.709<sup>b</sup></b><br>(0.022) |
| Ni   | <b>0.726<sup>b</sup></b><br>(0.018) | 0.269<br>(0.452)          | -0.116<br>(0.750)         | -0.018<br>(0.960)                   | 0.628<br>(0.052)                    | 0.317<br>(0.372)  | <b>0.872<sup>c</sup></b><br>(0.001) | -0.012<br>(0.973)         | -0.482<br>(0.159)                    | -0.245<br>(0.494)         | <b>0.701<sup>b</sup></b><br>(0.024) | 0.537<br>(0.110)                    |
| Co   | 0.612<br>(0.060)                    | 0.160<br>(0.660)          | -0.055<br>(0.880)         | -0.141<br>(0.698)                   | 0.483<br>(0.157)                    | -0.171<br>(0.636) | <b>0.823<sup>c</sup></b><br>(0.003) | -0.378<br>(0.281)         | <b>-0.738<sup>b</sup></b><br>(0.015) | -0.245<br>(0.494)         | 0.555<br>(0.096)                    | 0.354<br>(0.316)                    |
| Mn   | 0.236<br>(0.511)                    | 0.146<br>(0.688)          | 0.515<br>(0.128)          | 0.564<br>(0.090)                    | -0.103<br>(0.777)                   | 0.261<br>(0.467)  | <b>0.891<sup>c</sup></b><br>(0.001) | -0.200<br>(0.580)         | <b>-0.648<sup>b</sup></b><br>(0.043) | 0.024<br>(0.947)          | 0.527<br>(0.117)                    | 0.479<br>(0.162)                    |
| Fe   | 0.426<br>(0.220)                    | 0.409<br>(0.241)          | 0.462<br>(0.179)          | 0.176<br>(0.626)                    | 0.274<br>(0.444)                    | 0.340<br>(0.336)  | <b>0.791<sup>c</sup></b><br>(0.006) | -0.423<br>(0.223)         | <b>-0.779<sup>c</sup></b><br>(0.008) | -0.191<br>(0.596)         | 0.423<br>(0.223)                    | 0.337<br>(0.340)                    |
| As   | 0.302<br>(0.397)                    | -0.117<br>(0.747)         | 0.554<br>(0.097)          | -0.160<br>(0.659)                   | 0.246<br>(0.493)                    | -0.074<br>(0.839) | <b>0.869<sup>c</sup></b><br>(0.001) | -0.263<br>(0.463)         | <b>-0.765<sup>b</sup></b><br>(0.010) | -0.222<br>(0.538)         | 0.514<br>(0.129)                    | 0.422<br>(0.224)                    |

|    | Time                                 | <i>bla</i> <sub>TEM</sub> | <i>bla</i> <sub>SHV</sub> | <i>bla</i> <sub>OXA</sub> | <i>bla</i> <sub>CTX-M</sub>         | <i>int1</i>       | Time                                | <i>bla</i> <sub>TEM</sub> | <i>bla</i> <sub>SHV</sub>            | <i>bla</i> <sub>OXA</sub>      | <i>bla</i> <sub>CTX-M</sub>         | <i>int1</i>                          |
|----|--------------------------------------|---------------------------|---------------------------|---------------------------|-------------------------------------|-------------------|-------------------------------------|---------------------------|--------------------------------------|--------------------------------|-------------------------------------|--------------------------------------|
| Cd | <b>0.777<sup>c</sup></b><br>(0.008)  | -0.330<br>(0.351)         | -0.354<br>(0.315)         | -0.379<br>(0.280)         | 0.801 <sup>c</sup><br>(0.005)       | 0.093<br>(0.798)  | <b>0.858<sup>c</sup></b><br>(0.001) | -0.049<br>(0.892)         | -0.549<br>(0.100)                    | -0.199<br>(0.582)              | <b>0.735<sup>b</sup></b><br>(0.016) | 0.482<br>(0.159)                     |
| Ca | <b>-0.752<sup>b</sup></b><br>(0.012) | 0.294<br>(0.409)          | -0.141<br>(0.698)         | -0.128<br>(0.724)         | -0.471<br>(0.169)                   | -0.343<br>(0.333) | -0.566<br>(0.088)                   | -0.043<br>(0.906)         | 0.265<br>(0.460)                     | -0.650 <sup>b</sup><br>(0.042) | -0.271<br>(0.449)                   | -0.357<br>(0.311)                    |
| P  | 0.278<br>(0.437)                     | -0.257<br>(0.474)         | 0.210<br>(0.561)          | 0.265<br>(0.458)          | -0.123<br>(0.734)                   | 0.395<br>(0.258)  | <b>0.801<sup>c</sup></b><br>(0.005) | 0.217<br>(0.546)          | -0.304<br>(0.392)                    | -0.281<br>(0.431)              | 0.255<br>(0.478)                    | <b>0.789<sup>c</sup></b><br>(0.007)  |
| Cr | <b>0.821<sup>c</sup></b><br>(0.004)  | 0.043<br>(0.907)          | -0.158<br>(0.663)         | -0.170<br>(0.638)         | <b>0.681<sup>b</sup></b><br>(0.030) | 0.347<br>(0.327)  | <b>0.875<sup>c</sup></b><br>(0.001) | -0.018<br>(0.960)         | -0.486<br>(0.154)                    | -0.251<br>(0.485)              | <b>0.693<sup>b</sup></b><br>(0.026) | 0.529<br>(0.116)                     |
| Mg | -0.097<br>(0.790)                    | 0.463<br>(0.178)          | -0.055<br>(0.879)         | 0.354<br>(0.316)          | 0.014<br>(0.970)                    | 0.139<br>(0.702)  | <b>0.782<sup>c</sup></b><br>(0.008) | -0.216<br>(0.549)         | <b>-0.667<sup>b</sup></b><br>(0.035) | 0.019<br>(0.958)               | 0.578<br>(0.080)                    | 0.292<br>(0.412)                     |
| Ba | -0.311<br>(0.382)                    | -0.049<br>(0.893)         | -0.207<br>(0.565)         | 0.128<br>(0.724)          | -0.384<br>(0.273)                   | 0.091<br>(0.802)  | 0.573<br>(0.083)                    | 0.218<br>(0.545)          | -0.187<br>(0.605)                    | -0.232<br>(0.519)              | 0.237<br>(0.510)                    | <b>0.679<sup>b</sup></b><br>(0.031)  |
| Al | 0.049<br>(0.893)                     | -0.086<br>(0.812)         | 0.351<br>(0.320)          | 0.326<br>(0.358)          | -0.351<br>(0.320)                   | 0.535<br>(0.111)  | <b>0.765<sup>c</sup></b><br>(0.010) | 0.144<br>(0.691)          | -0.420<br>(0.227)                    | -0.129<br>(0.722)              | 0.401<br>(0.250)                    | 0.609<br>(0.062)                     |
| Na | <b>-0.790<sup>c</sup></b><br>(0.007) | -0.053<br>(0.885)         | -0.117<br>(0.747)         | 0.136<br>(0.708)          | -0.599<br>(0.067)                   | -0.420<br>(0.227) | -0.354<br>(0.316)                   | 0.028<br>(0.939)          | 0.402<br>(0.249)                     | 0.101<br>(0.781)               | -0.451<br>(0.191)                   | -0.132<br>(0.717)                    |
| K  | 0.497<br>(0.143)                     | -0.321<br>(0.366)         | 0.569<br>(0.086)          | 0.071<br>(0.845)          | 0.213<br>(0.554)                    | 0.426<br>(0.219)  | <b>0.646<sup>b</sup></b><br>(0.044) | -0.190<br>(0.599)         | -0.570<br>(0.086)                    | -0.306<br>(0.390)              | 0.190<br>(0.599)                    | 0.494<br>(0.147)                     |
| Hg | -0.018<br>(0.960)                    | -0.578<br>(0.080)         | 0.236<br>(0.511)          | -0.467<br>(0.174)         | 0.091<br>(0.803)                    | -0.079<br>(0.829) | -0.248<br>(0.489)                   | 0.273<br>(0.446)          | 0.345<br>(0.328)                     | 0.183<br>(0.613)               | 0.188<br>(0.603)                    | -0.115<br>(0.751)                    |
| TC | -0.511<br>(0.132)                    | -0.085<br>(0.815)         | 0.389<br>(0.266)          | 0.024<br>(0.947)          | -0.195<br>(0.590)                   | 0.085<br>(0.815)  | -0.305<br>(0.392)                   | 0.579<br>(0.079)          | 0.482<br>(0.159)                     | 0.098<br>(0.787)               | -0.439<br>(0.204)                   | 0.250<br>(0.486)                     |
| TN | <b>-0.802<sup>c</sup></b><br>(0.005) | -0.046<br>(0.900)         | 0.316<br>(0.374)          | -0.067<br>(0.854)         | -0.559<br>(0.093)                   | -0.474<br>(0.166) | <b>0.693<sup>b</sup></b><br>(0.026) | -0.067<br>(0.854)         | 0.371<br>(0.291)                     | 0.349<br>(0.324)               | 0.012<br>(0.973)                    | <b>-0.693<sup>b</sup></b><br>(0.026) |



|                             | Time                                 | <i>bla</i> <sub>TEM</sub> | <i>bla</i> <sub>SHV</sub> | <i>bla</i> <sub>OXA</sub> | <i>bla</i> <sub>CTX-M</sub>          | <i>int1</i>       | Time                                 | <i>bla</i> <sub>TEM</sub>            | <i>bla</i> <sub>SHV</sub>             | <i>bla</i> <sub>OXA</sub> | <i>bla</i> <sub>CTX-M</sub> | <i>int1</i>       |
|-----------------------------|--------------------------------------|---------------------------|---------------------------|---------------------------|--------------------------------------|-------------------|--------------------------------------|--------------------------------------|---------------------------------------|---------------------------|-----------------------------|-------------------|
| ExtP                        | <b>0.967</b> <sup>c</sup><br>(0.001) | -0.176<br>(0.651)         | 0.067<br>(0.865)          | -0.183<br>(0.637)         | <b>0.683</b> <sup>b</sup><br>(0.042) | 0.183<br>(0.637)  | <b>0.967</b> <sup>c</sup><br>(0.001) | -0.067<br>(0.865)                    | -0.633<br>(0.067)                     | 0.025<br>(0.949)          | 0.400<br>(0.286)            | 0.600<br>(0.088)  |
| ExtK                        | <b>0.806</b> <sup>c</sup><br>(0.005) | -0.316<br>(0.374)         | 0.091<br>(0.803)          | -0.200<br>(0.580)         | 0.418<br>(0.229)                     | 0.285<br>(0.425)  | <b>0.782</b> <sup>c</sup><br>(0.008) | -0.164<br>(0.651)                    | <b>-0.745</b> <sup>b</sup><br>(0.013) | -0.317<br>(0.372)         | 0.467<br>(0.174)            | 0.442<br>(0.200)  |
| <i>bla</i> <sub>TEM</sub>   | -0.146<br>(0.688)                    | -                         | 0.298<br>(0.403)          | 0.584<br>(0.077)          | 0.061<br>(0.868)                     | 0.006<br>(0.987)  | 0.055<br>(0.881)                     | -                                    | <b>0.758</b> <sup>b</sup><br>(0.011)  | 0.329<br>(0.353)          | -0.115<br>(0.751)           | 0.588<br>(0.074)  |
| <i>bla</i> <sub>SHV</sub>   | -0.127<br>(0.726)                    | 0.298<br>(0.403)          | -                         | 0.370<br>(0.293)          | -0.224<br>(0.533)                    | 0.188<br>(0.603)  | -0.491<br>(0.150)                    | <b>0.758</b> <sup>b</sup><br>(0.011) | -                                     | 0.390<br>(0.265)          | -0.345<br>(0.328)           | 0.103<br>(0.777)  |
| <i>bla</i> <sub>OXA</sub>   | 0.018<br>(0.960)                     | 0.584<br>(0.077)          | 0.370<br>(0.293)          | -                         | -0.236<br>(0.511)                    | 0.564<br>(0.090)  | -0.012<br>(0.973)                    | 0.329<br>(0.353)                     | 0.390<br>(0.265)                      | -                         | -0.171<br>(0.637)           | 0.165<br>(0.649)  |
| <i>bla</i> <sub>CTX-M</sub> | <b>0.673</b> <sup>b</sup><br>(0.033) | 0.061<br>(0.868)          | -0.224<br>(0.533)         | -0.236<br>(0.511)         | -                                    | -0.030<br>(0.934) | 0.418<br>(0.229)                     | -0.115<br>(0.751)                    | -0.345<br>(0.328)                     | -0.171<br>(0.637)         | -                           | -0.067<br>(0.855) |
| <i>int1</i>                 | 0.467<br>(0.174)                     | 0.006<br>(0.987)          | 0.188<br>(0.603)          | 0.564<br>(0.090)          | -0.030<br>(0.934)                    | -                 | <b>0.733</b> <sup>b</sup><br>(0.016) | 0.588<br>(0.074)                     | 0.103<br>(0.777)                      | 0.165<br>(0.649)          | -0.067<br>(0.855)           | -                 |

Notes: <sup>a</sup> Nutrients and metals = mass per mass of dry soil; genes = copies per mass of dry soil; time = years

<sup>b</sup> 95% Confidence correlation

<sup>c</sup> 99% Confidence correlation
